# Supplementary material for: Considering Two Aspects of Fish Welfare on African Catfish (Clarias gariepinus) Fillet throughout Postmortem Condition: Efficiency and Mechanisms
Source: MDPI journal article supplement (doi:10.3390/foods11244090), 2022-12-17
Supplement: s1 [file s1]

# Supplementary for (Hematyar, Consequences of fish welfare on African catfish (*Clarias gariepinus*) fillet throughout postmortem condition: efficiency and mechanisms)

**Table S1.** The number of fillets for each group.

|             | <b>T0</b> | <b>T3</b> | <b>T6</b> | <b>T9</b> |
|-------------|-----------|-----------|-----------|-----------|
| <b>D90</b>  | B=6       | B=6       | B=6       | B=6       |
|             | Unb=6     | Unb=6     | Unb=6     | Unb=6     |
| <b>D120</b> | B=6       | B=6       | B=6       | B=6       |
|             | Unb=6     | Unb=6     | Unb=6     | Unb=6     |
| <b>D150</b> | B=6       | B=6       | B=6       | B=6       |
|             | Unb=6     | Unb=6     | Unb=6     | Unb=6     |

B: Bled, Unb: Un-bled, D: Density, T: Time

**Table S2:** Three-Way ANOVA p-value table for the data variables

| Effect of (p-value)→        |                  | Stocking density | Slaughter ing method | Storage time | Stocking density x Slaughterin g method | Stocking density x Storage time | Slaughterin g method x Storage time | Stocking density x Slaughterin g method x Storage time |
|-----------------------------|------------------|------------------|----------------------|--------------|-----------------------------------------|---------------------------------|-------------------------------------|--------------------------------------------------------|
| Variable ↓                  |                  |                  |                      |              |                                         |                                 |                                     |                                                        |
| Rigor index                 |                  | 0.001            | <0.0001              | <0.0001      | 0.055                                   | <0.0001                         | <0.0001                             | <0.0001                                                |
| pH                          |                  | 0.166            | <0.001               | <0.0001      | 0.555                                   | <0.0001                         | <0.0001                             | <0.0001                                                |
| Calpain activity            |                  | <0.05            | 0.3590               | <0.0001      | 0.7160                                  | <0.001                          | 0.8550                              | 0.6870                                                 |
| Hardness analysis           |                  | <0.0001          | <0.001               | <0.0001      | 0.4110                                  | <0.01                           | <0.01                               | <0.05                                                  |
| Liquid loss                 |                  | 0.142            | <0.001               | <0.0001      | 0.414                                   | 0.391                           | 0.092                               | 0.224                                                  |
| Haem content                |                  | <0.001           | <0.0001              | <0.0001      | <0.001                                  | 0.20                            | <0.0001                             | 0.232                                                  |
| Lipid and protein oxidation | TBARS            | 0.313            | <0.001               | <0.0001      | 0.219                                   | 0.252                           | <0.001                              | 0.703                                                  |
|                             | Carbonyl content | 0.793            | <0.0001              | <0.0001      | <0.05                                   | 0.268                           | <0.0001                             | 0.418                                                  |

Significance interactions <0.05, <0.01, <0.001, <0.0001 are indicated as the green colour cells.

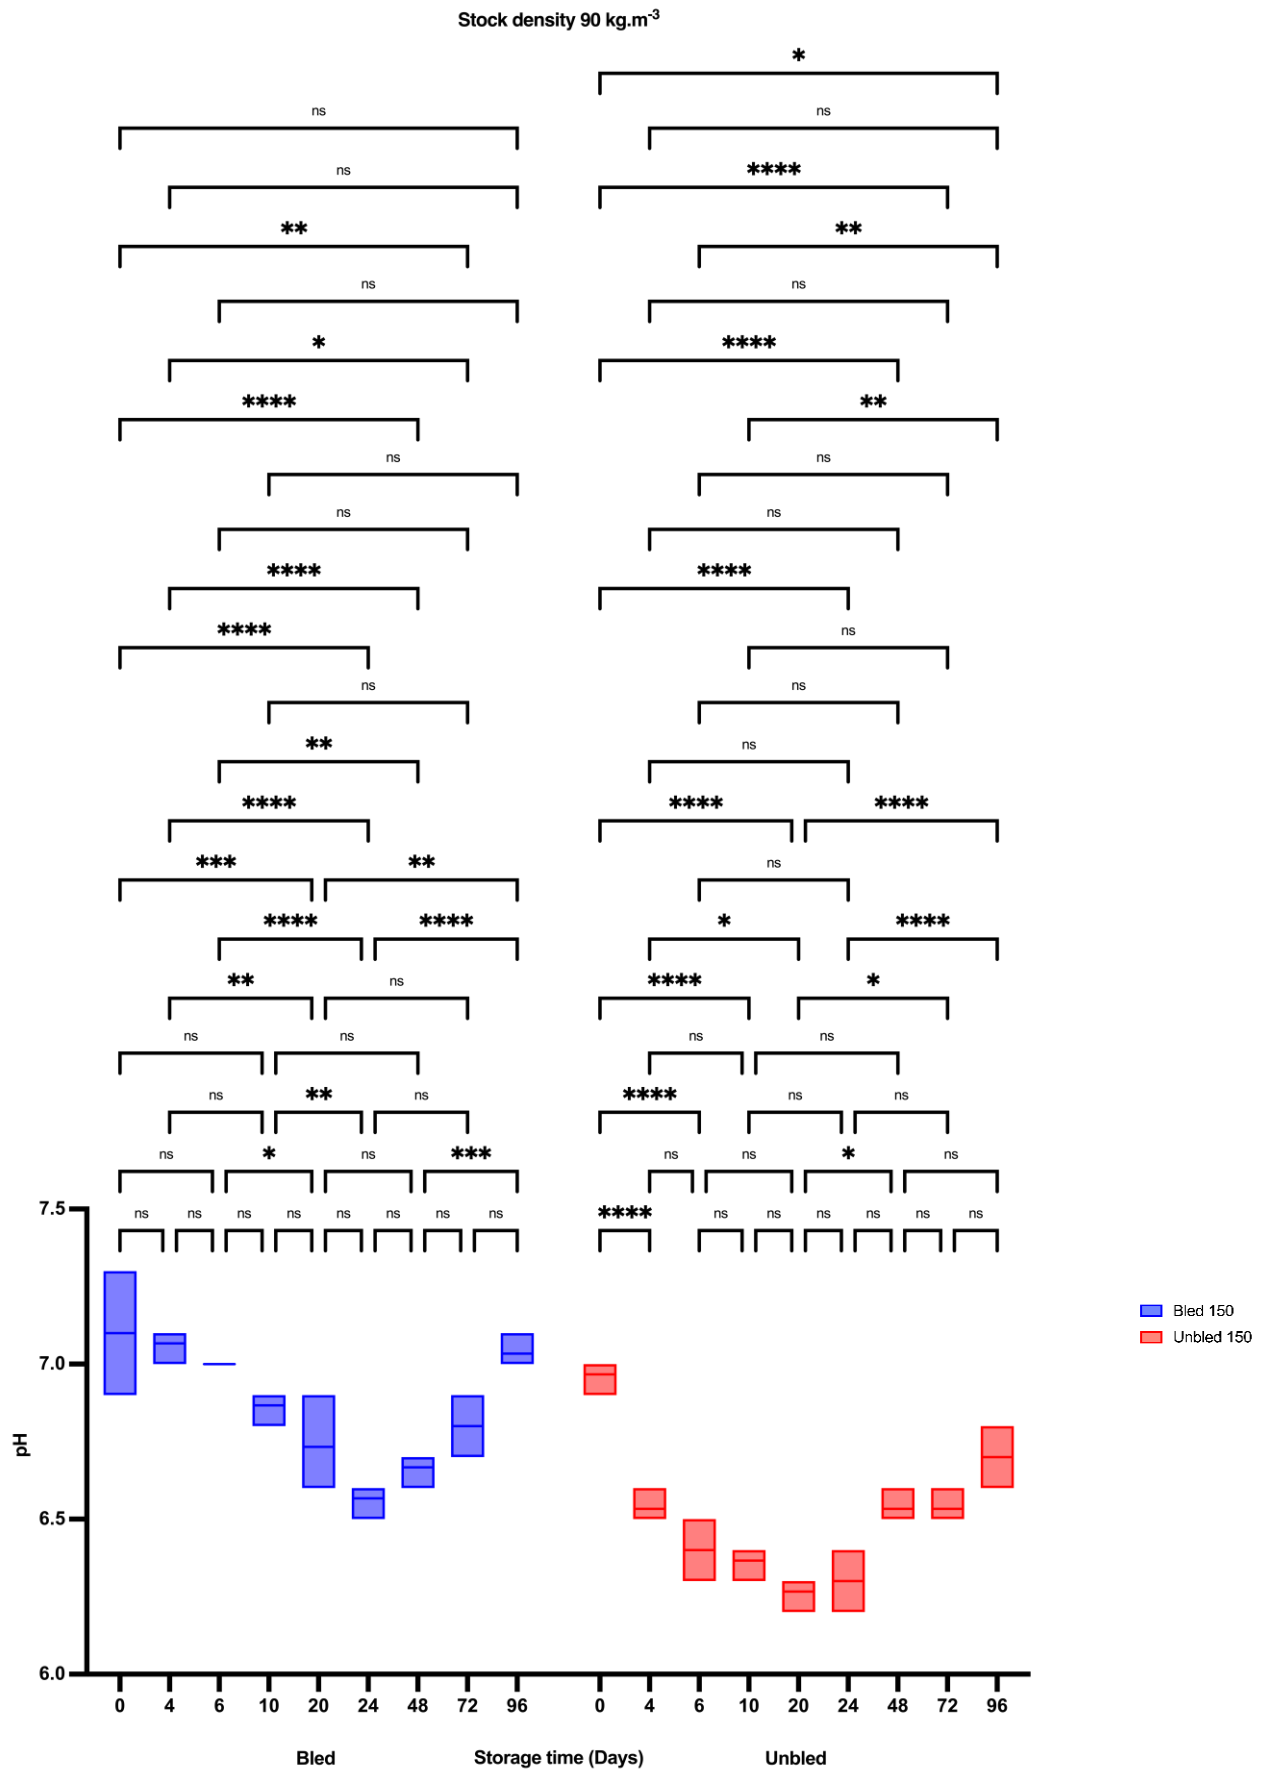

**Figure S1A.** pH: During the storage time (0, 4, 6, 10, 20, 24, 46, 72, and 96 Days) in bled and un-bled groups at different stock density 90 kg.m<sup>-3</sup>; ( $p < 0.05$ , Tukey's multiple comparisons test; ns: non-significant; \*  $p < 0.05$ ; \*\*  $p < 0.01$ ; \*\*\*  $p < 0.001$ ; \*\*\*\*  $p < 0.0001$ ). Box plots showing line at mean.

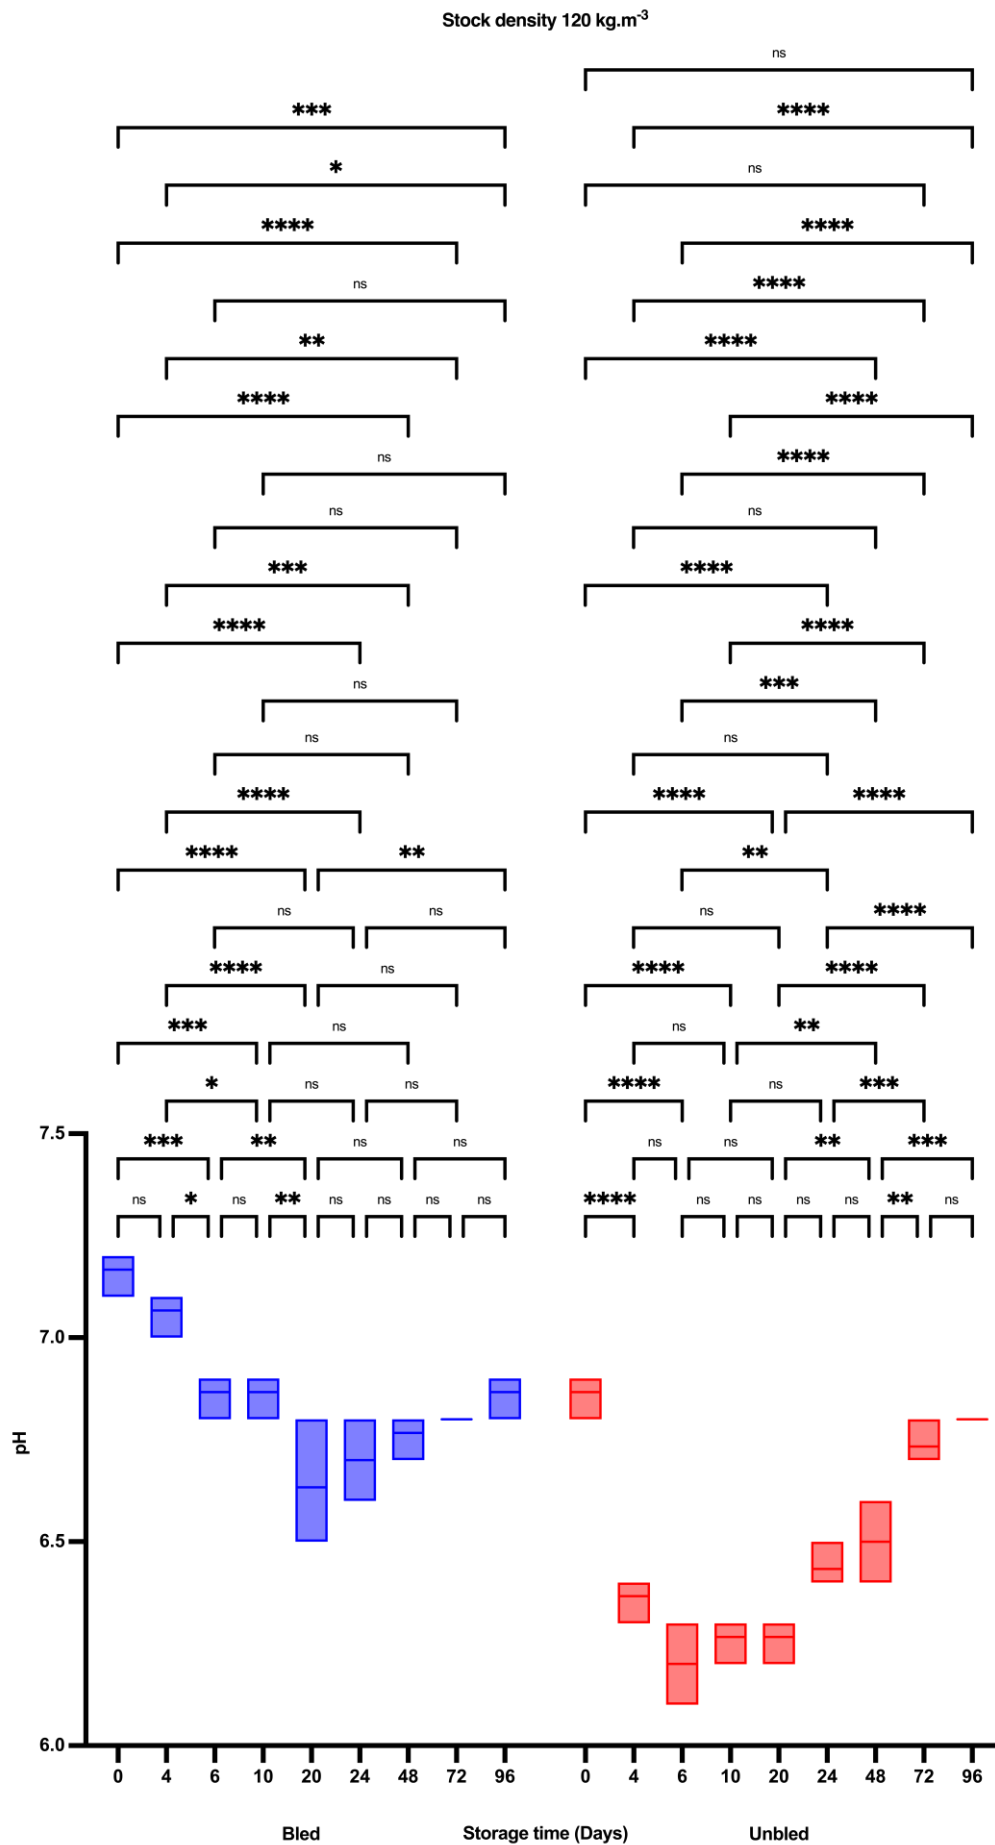

**Figure S1B.** pH: During the storage time (0, 4, 6, 10, 20, 24, 46, 72, and 96 Days) in bled and un-bled groups at different stock density 120 kg.m<sup>-3</sup>; ( $p < 0.05$ , Tukey's multiple comparisons test; ns: non-significant; \*  $p < 0.05$ ; \*\*  $p < 0.01$ ; \*\*\*  $p < 0.001$ ; \*\*\*\*  $p < 0.0001$ ). Box plots showing line at mean.

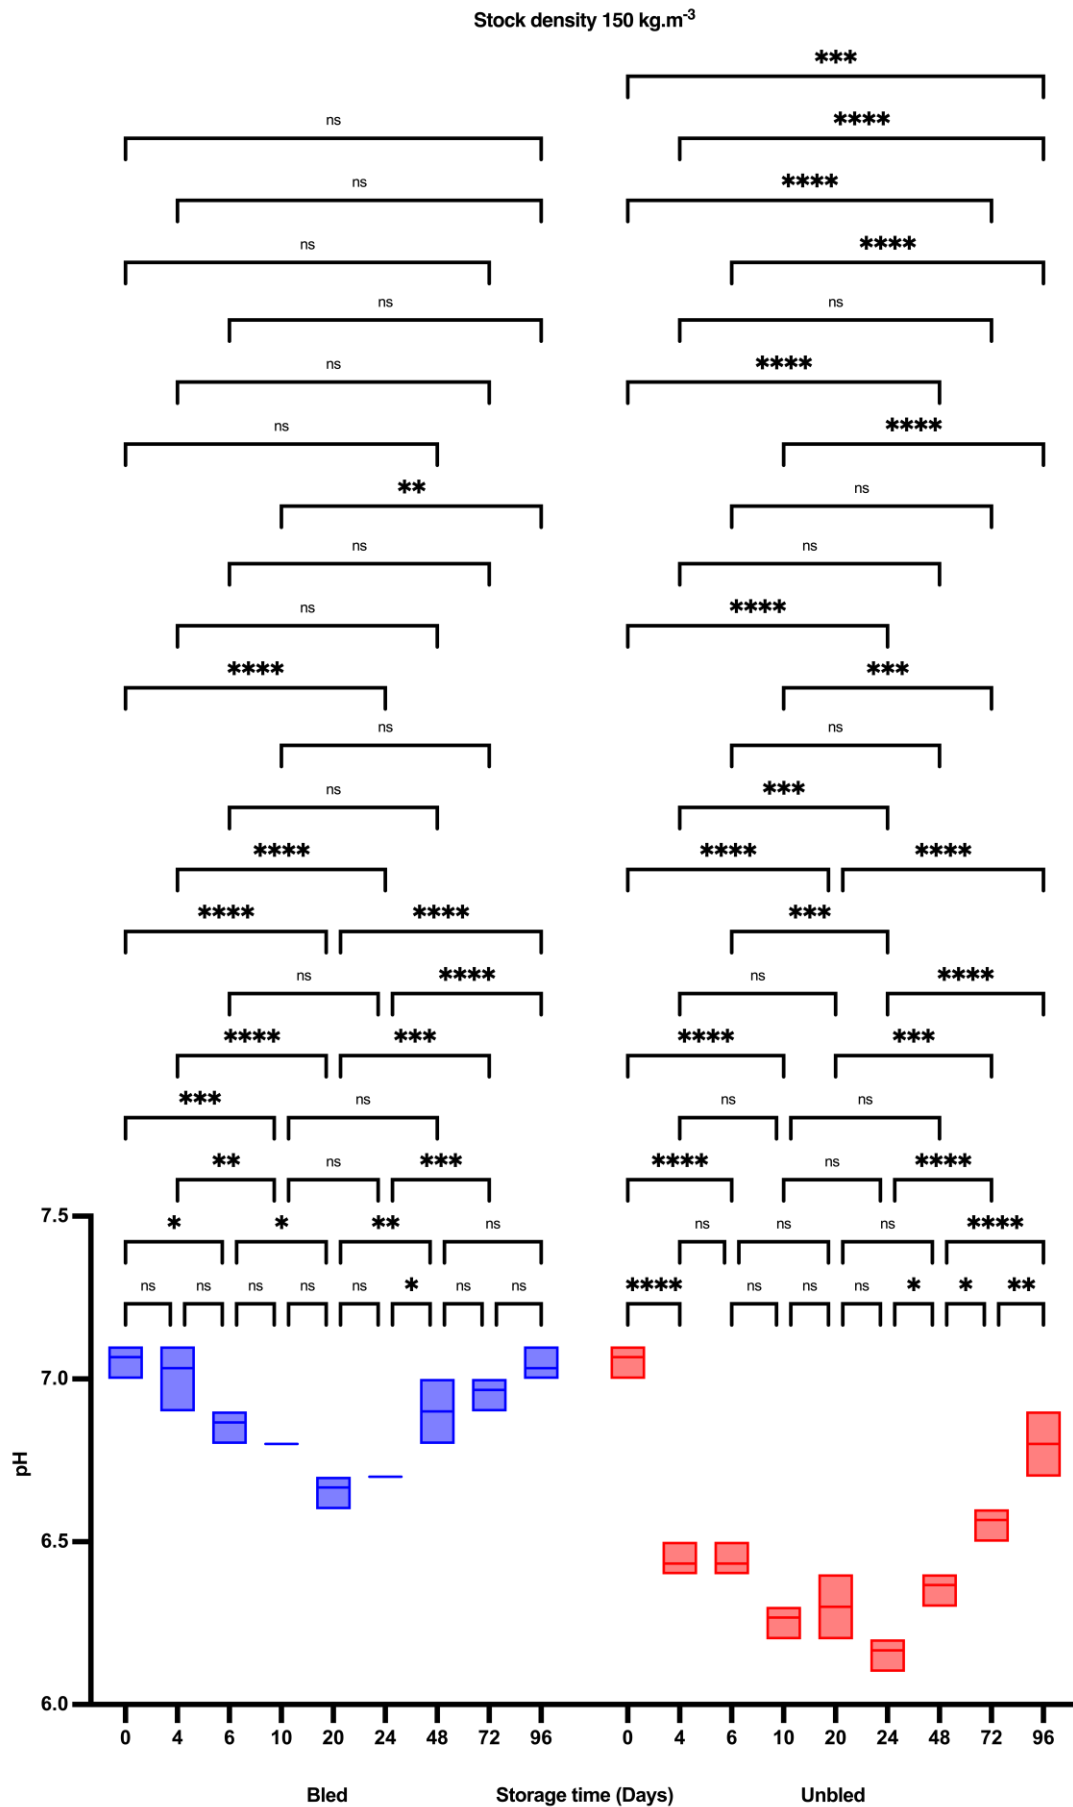

**Figure S1C.** pH: During the storage time (0, 4, 6, 10, 20, 24, 46, 72, and 96 Days) in bled and un-bled groups at different stock density 150 kg.m<sup>-3</sup>; ( $p < 0.05$ , Tukey's multiple comparisons test; ns: non-significant; \*  $p < 0.05$ ; \*\*  $p < 0.01$ ; \*\*\*  $p < 0.001$ ; \*\*\*\* $p < 0.0001$ ). Box plots showing line at mean.

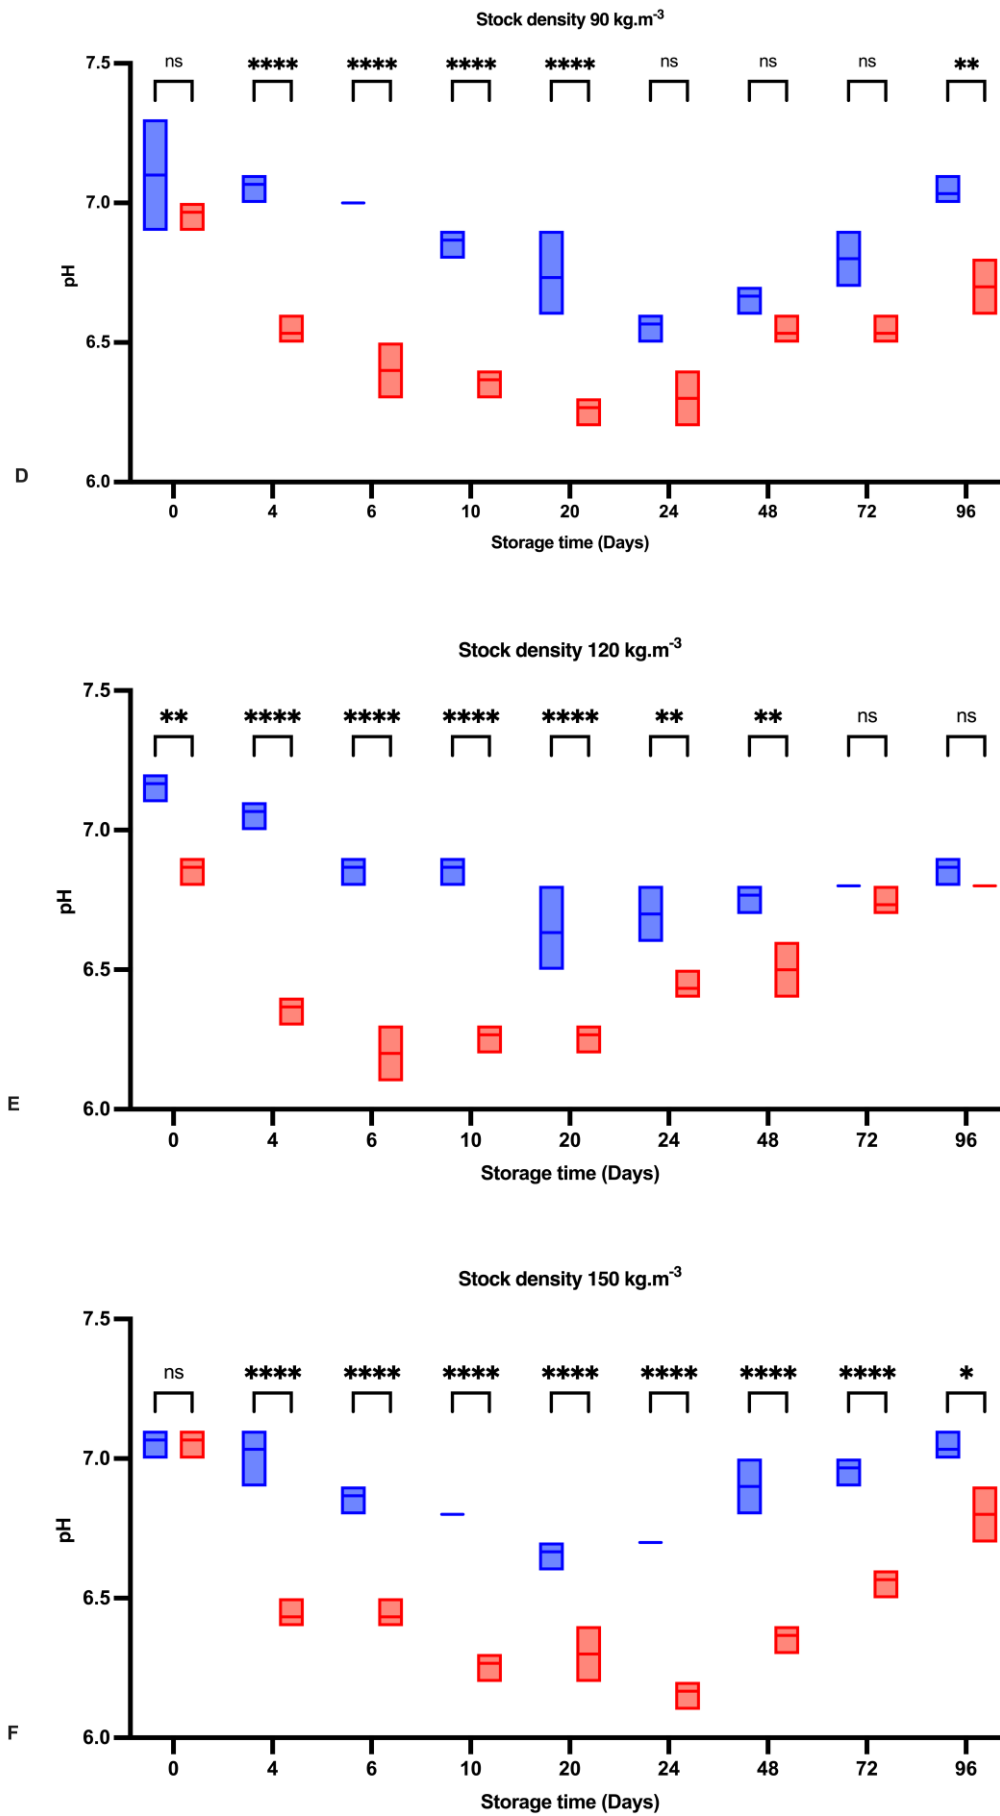

**Figure S1DEF.** pH: In bled and un-bled groups at each storage time (0, 4, 6, 10, 20, 24, 46, 72, and 96 Days) and at different stock densities (90, 120 and 150 kg.m<sup>-3</sup>); ( $p < 0.05$ , Tukey's multiple comparisons test; ns: non-significant; \*  $p < 0.05$ ; \*\*  $p < 0.01$ ; \*\*\*  $p < 0.001$ ; \*\*\*\*  $p < 0.0001$ ). Box plots showing line at mean.

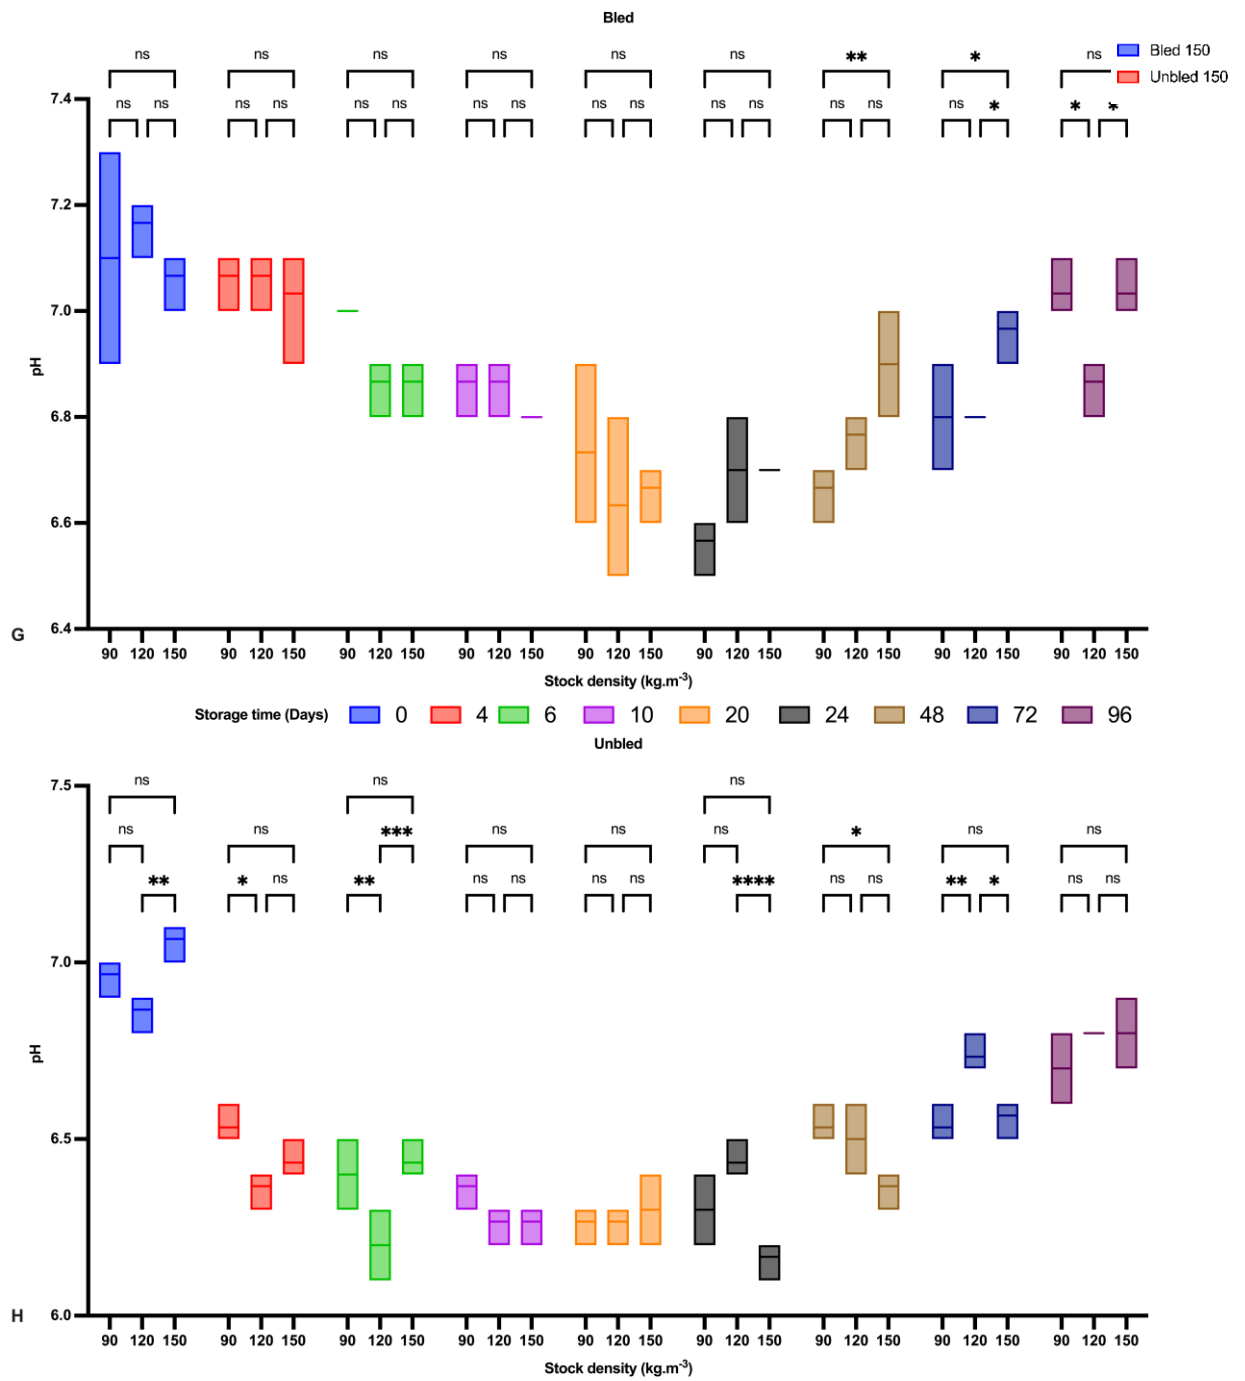

**Figure S1GH.** pH: In different stocking densities (90, 120 and 150 kg.m<sup>-3</sup>) during storage time (0, 4, 6, 10, 20, 24, 46, 72, and 96 Days) in bled and un-bled groups; ( $p < 0.05$ , Tukey's multiple comparisons test; ns: non-significant; \*  $p < 0.05$ ; \*\*  $p < 0.01$ ; \*\*\*  $p < 0.001$ ; \*\*\*\* $p < 0.0001$ ). Box plots showing line at mean.

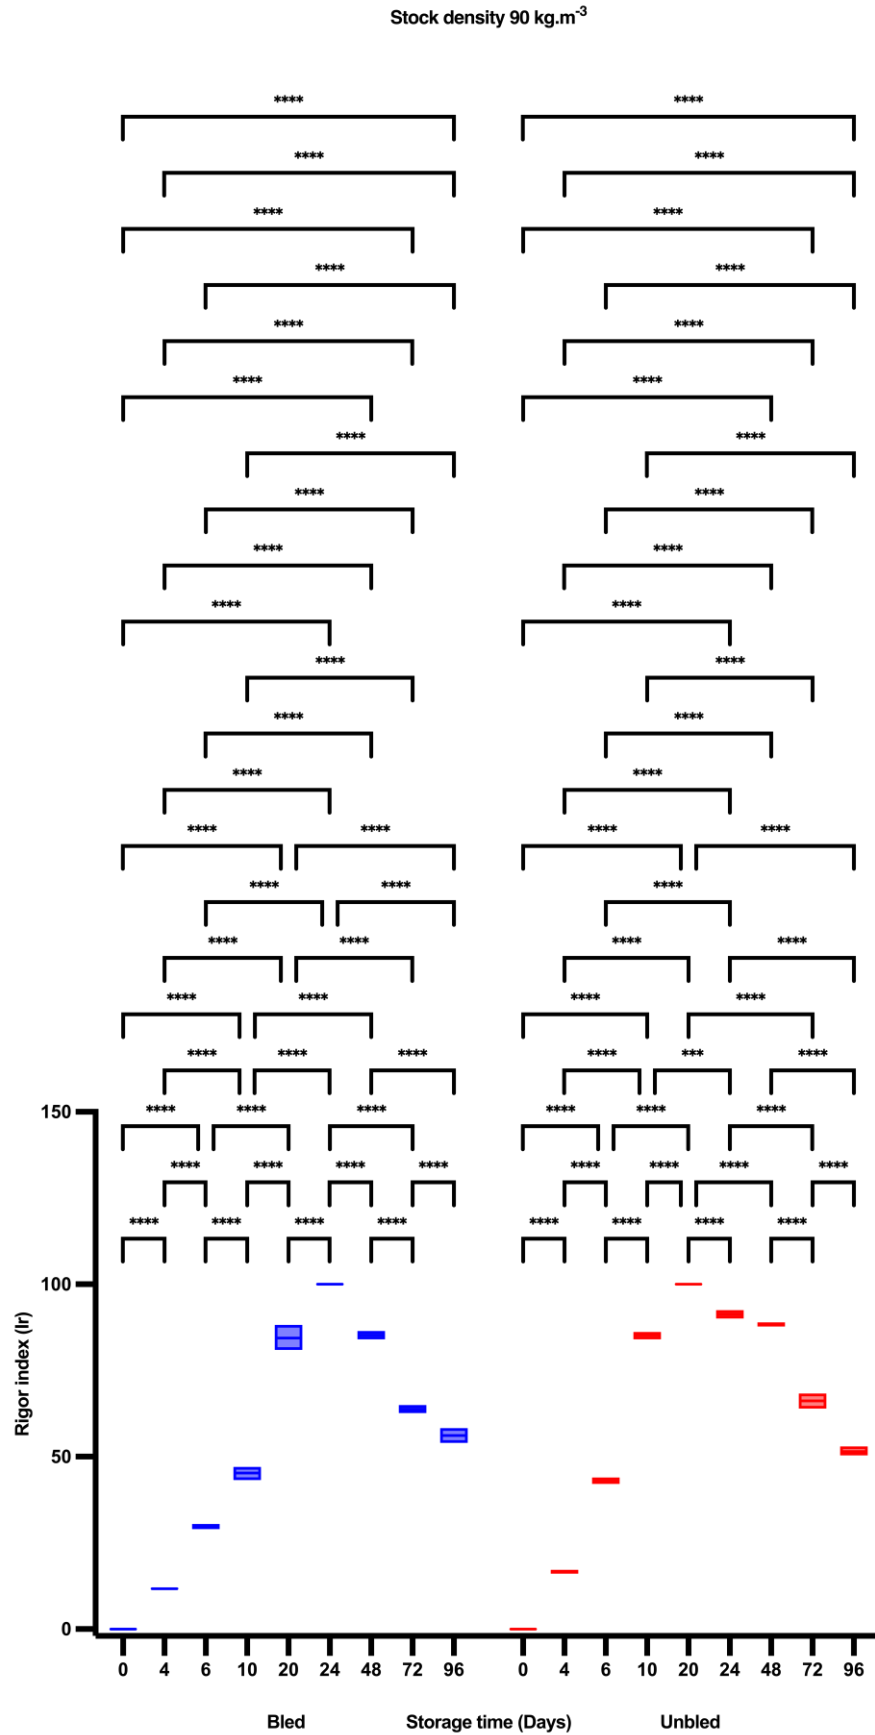

**Figure S2A.** Rigor index: During the storage time (0, 4, 6, 10, 20, 24, 46, 72, and 96 Days) in bled and un-bled groups at different stock density 90 kg.m<sup>-3</sup>; ( $p < 0.05$ , Tukey's multiple comparisons test; ns: non-significant; \*  $p < 0.05$ ; \*\*  $p < 0.01$ ; \*\*\*  $p < 0.001$ ; \*\*\*\*  $p < 0.0001$ ). Box plots showing line at mean.



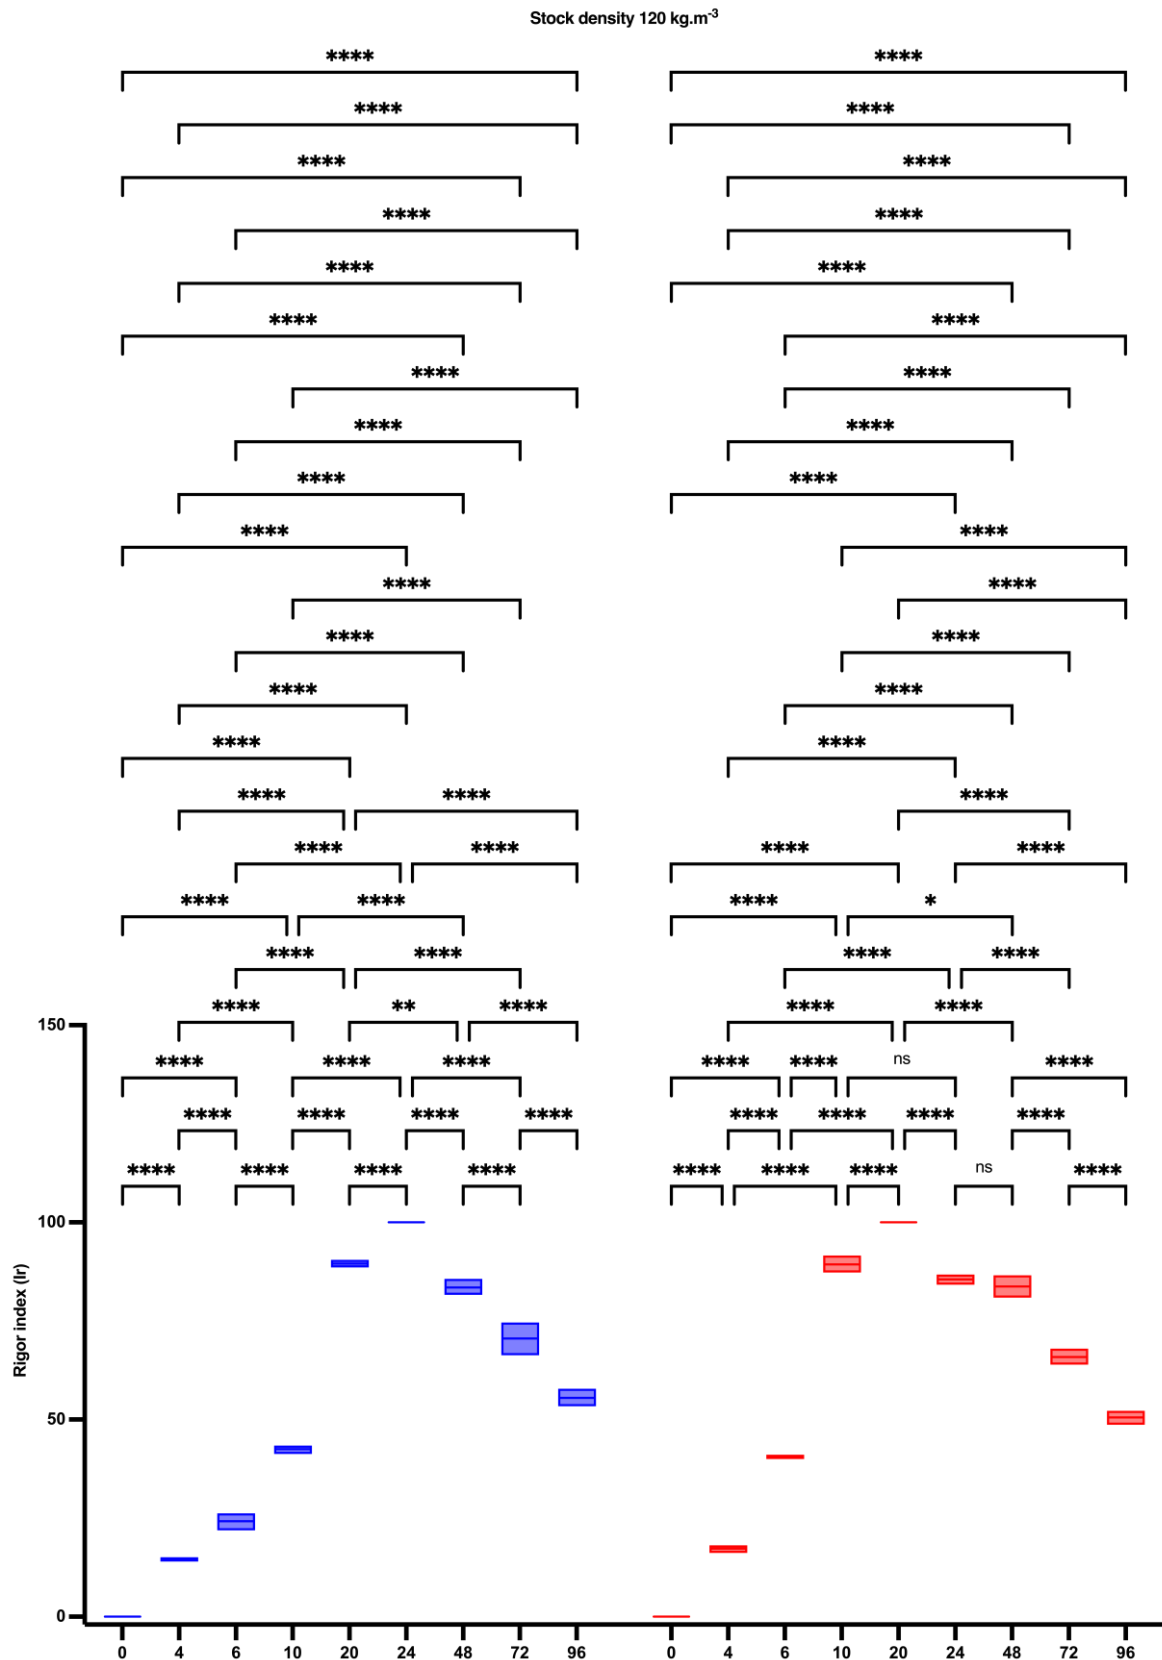

**Figure S2B.** Rigor index: During the storage time (0, 4, 6, 10, 20, 24, 46, 72, and 96 Days) in bled and un-bled groups at different stock density 120 kg.m<sup>-3</sup>; ( $p < 0.05$ , Tukey's multiple comparisons test; ns: non-significant; \*  $p < 0.05$ ; \*\*  $p < 0.01$ ; \*\*\*  $p < 0.001$ ; \*\*\*\* $p < 0.0001$ ). Box plots showing line at mean.

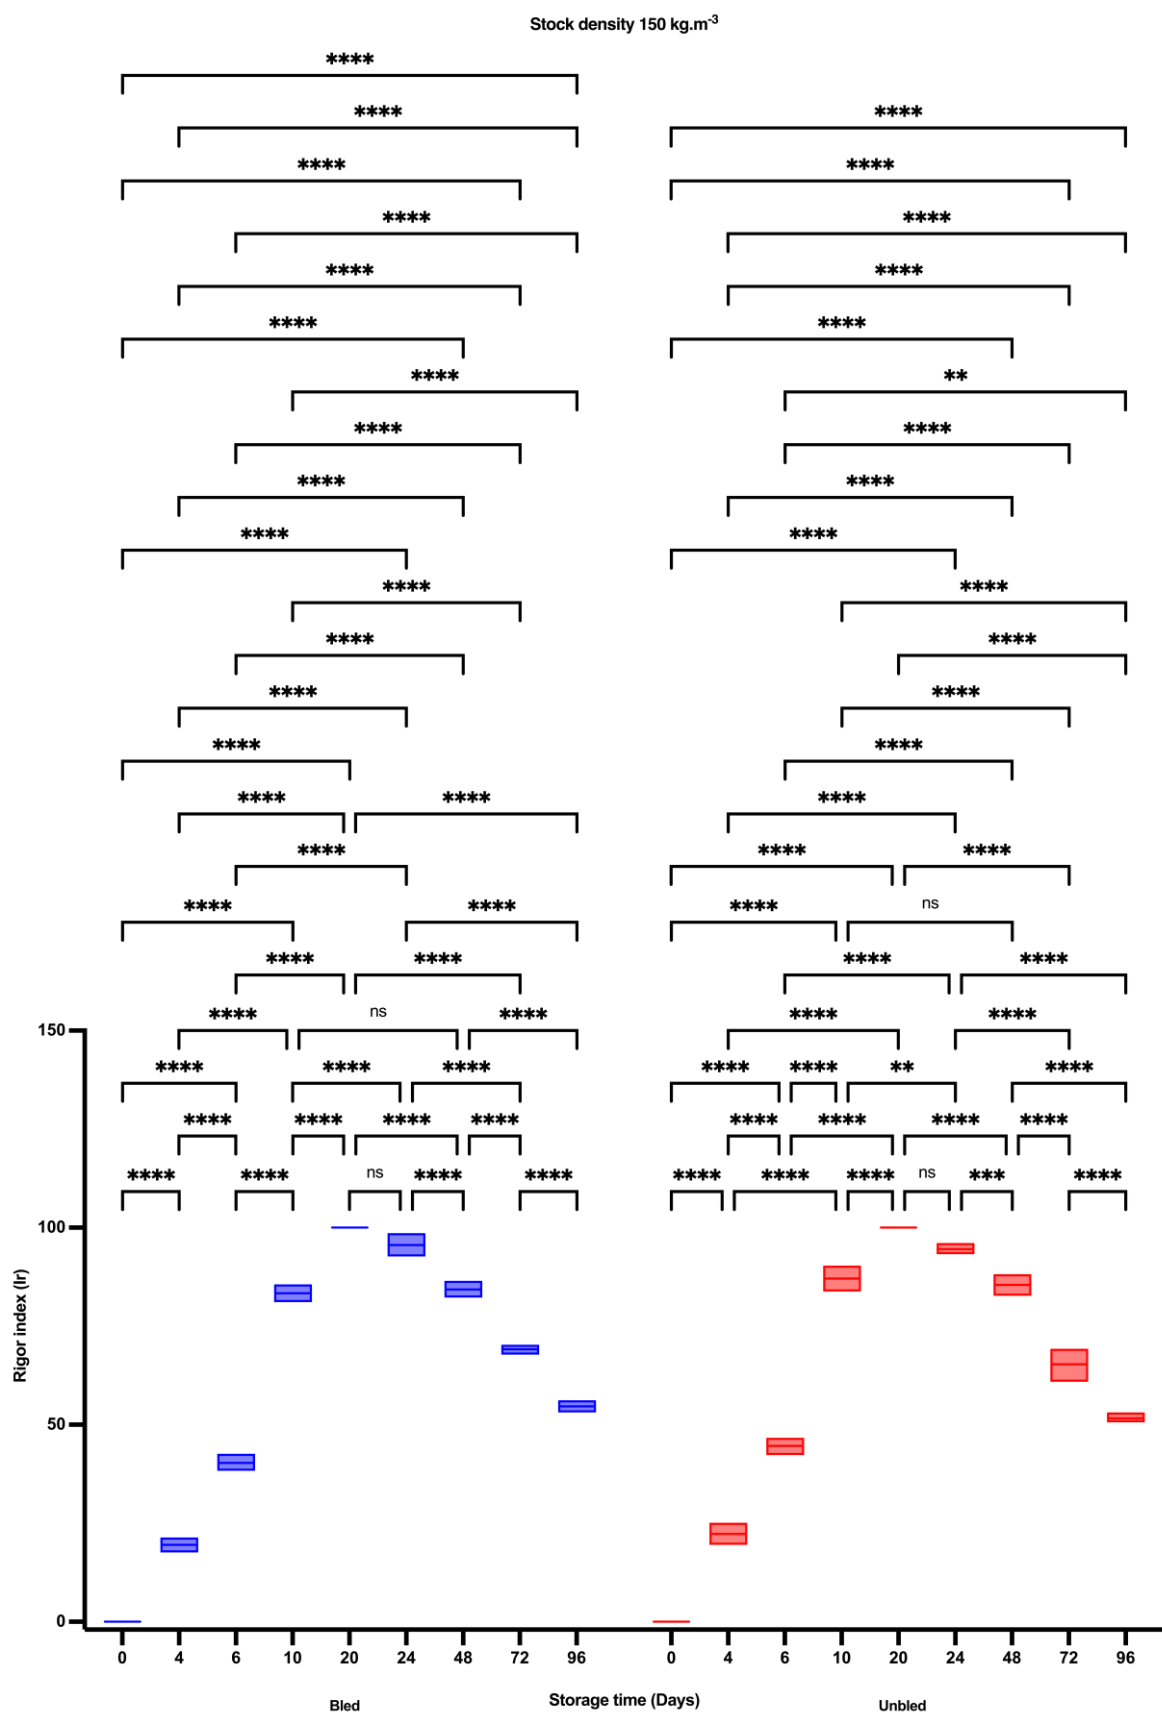

**Figure S2C.** Rigor index: During the storage time (0, 4, 6, 10, 20, 24, 46, 72, and 96 Days) in bled and un-bled groups at different stock density 150 kg.m<sup>-3</sup>; ( $p < 0.05$ , Tukey's multiple comparisons test; ns: non-significant; \*  $p < 0.05$ ; \*\*  $p < 0.01$ ; \*\*\*  $p < 0.001$ ; \*\*\*\*  $p < 0.0001$ ). Box plots showing line at mean.

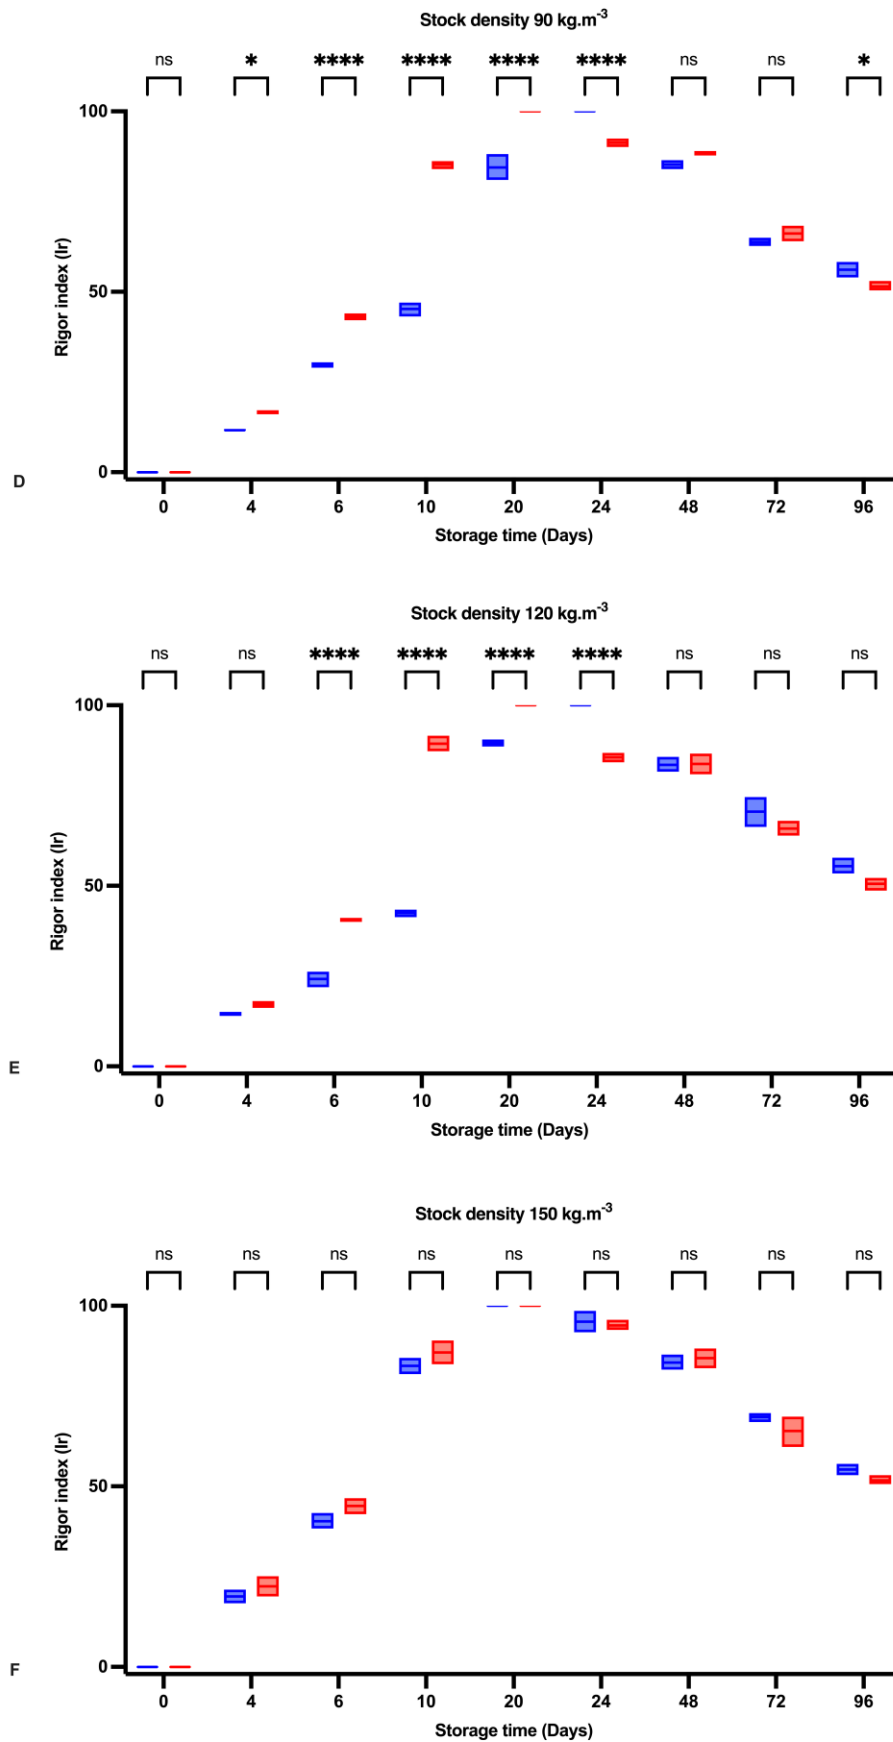

**Figure S2DEF.** Rigor index: In bled and un-bled groups at each storage time (0, 4, 6, 10, 20, 24, 46, 72, and 96 Days) and at different stock densities (90, 120 and 150 kg.m<sup>-3</sup>); ( $p < 0.05$ , Tukey's multiple comparisons test; ns: non-significant; \*  $p < 0.05$ ; \*\*  $p < 0.01$ ; \*\*\*  $p < 0.001$ ; \*\*\*\*  $p < 0.0001$ ). Box plots showing line at mean.

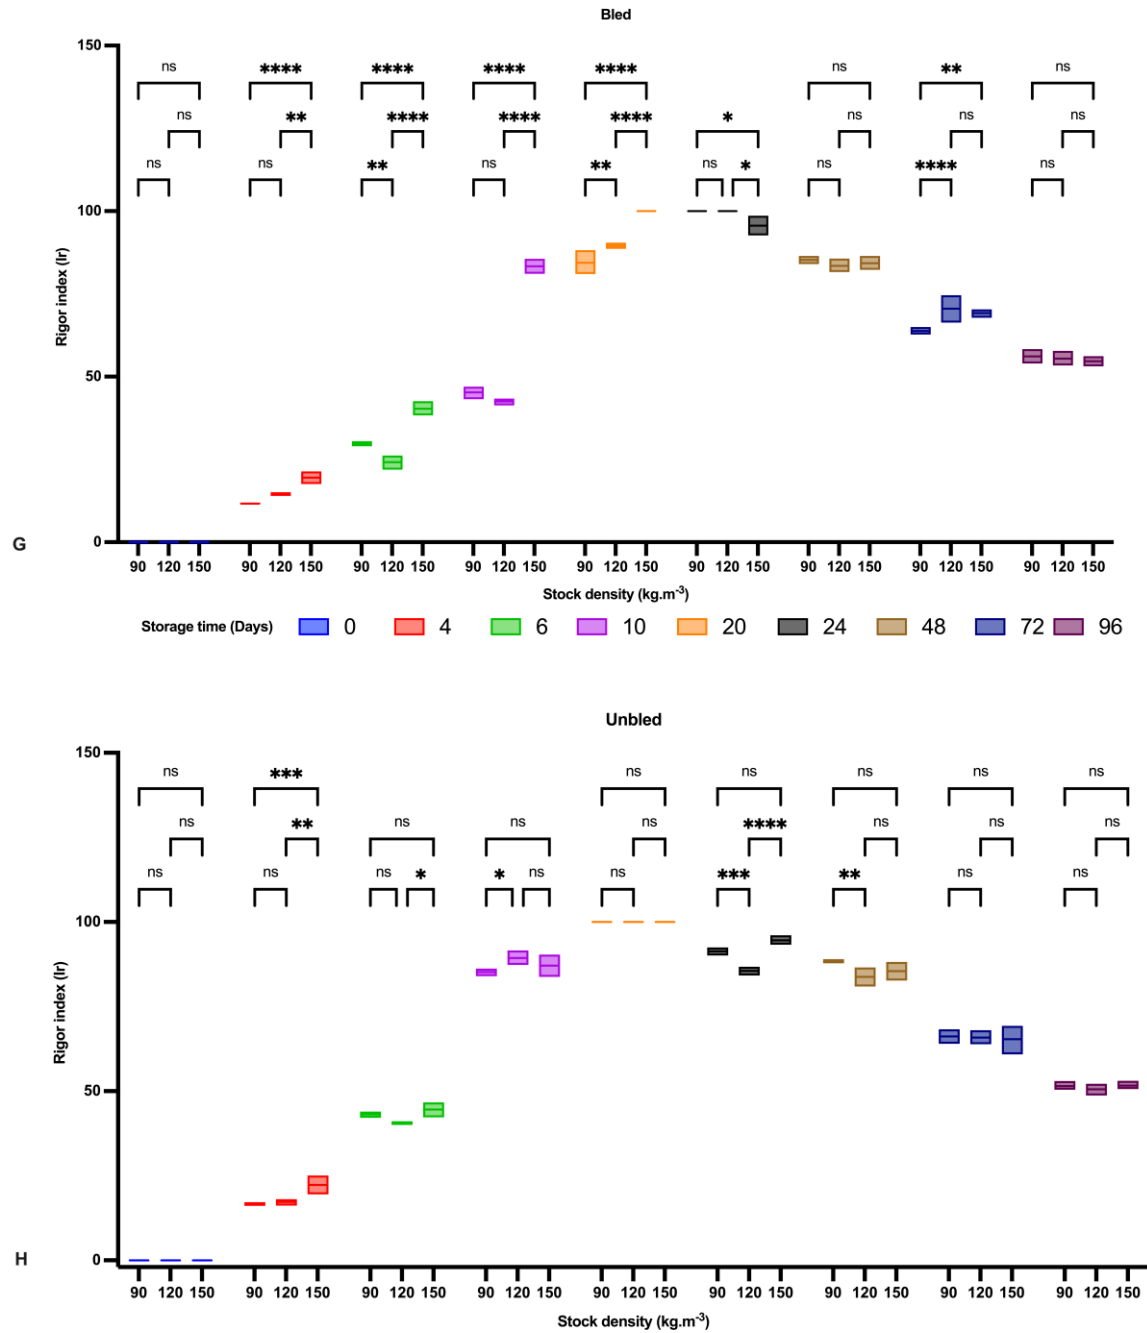

**Figure S2GH.** Rigor index: In different stocking densities (90, 120 and 150 kg.m<sup>-3</sup>) during storage time (0, 4, 6, 10, 20, 24, 46, 72, and 96 Days) in bled and un-bled groups; ( $p < 0.05$ , Tukey's multiple comparisons test; ns: non-significant; \*  $p < 0.05$ ; \*\*  $p < 0.01$ ; \*\*\*  $p < 0.001$ ; \*\*\*\*  $p < 0.0001$ ). Box plots showing line at mean.
